# Supplementary material
Source: PubMed Central journal article supplement (PMC8406430)
Supplement: NIHMS1612409-supplement-2.pdf [file NIHMS1612409-supplement-2.pdf]

# Figure S1

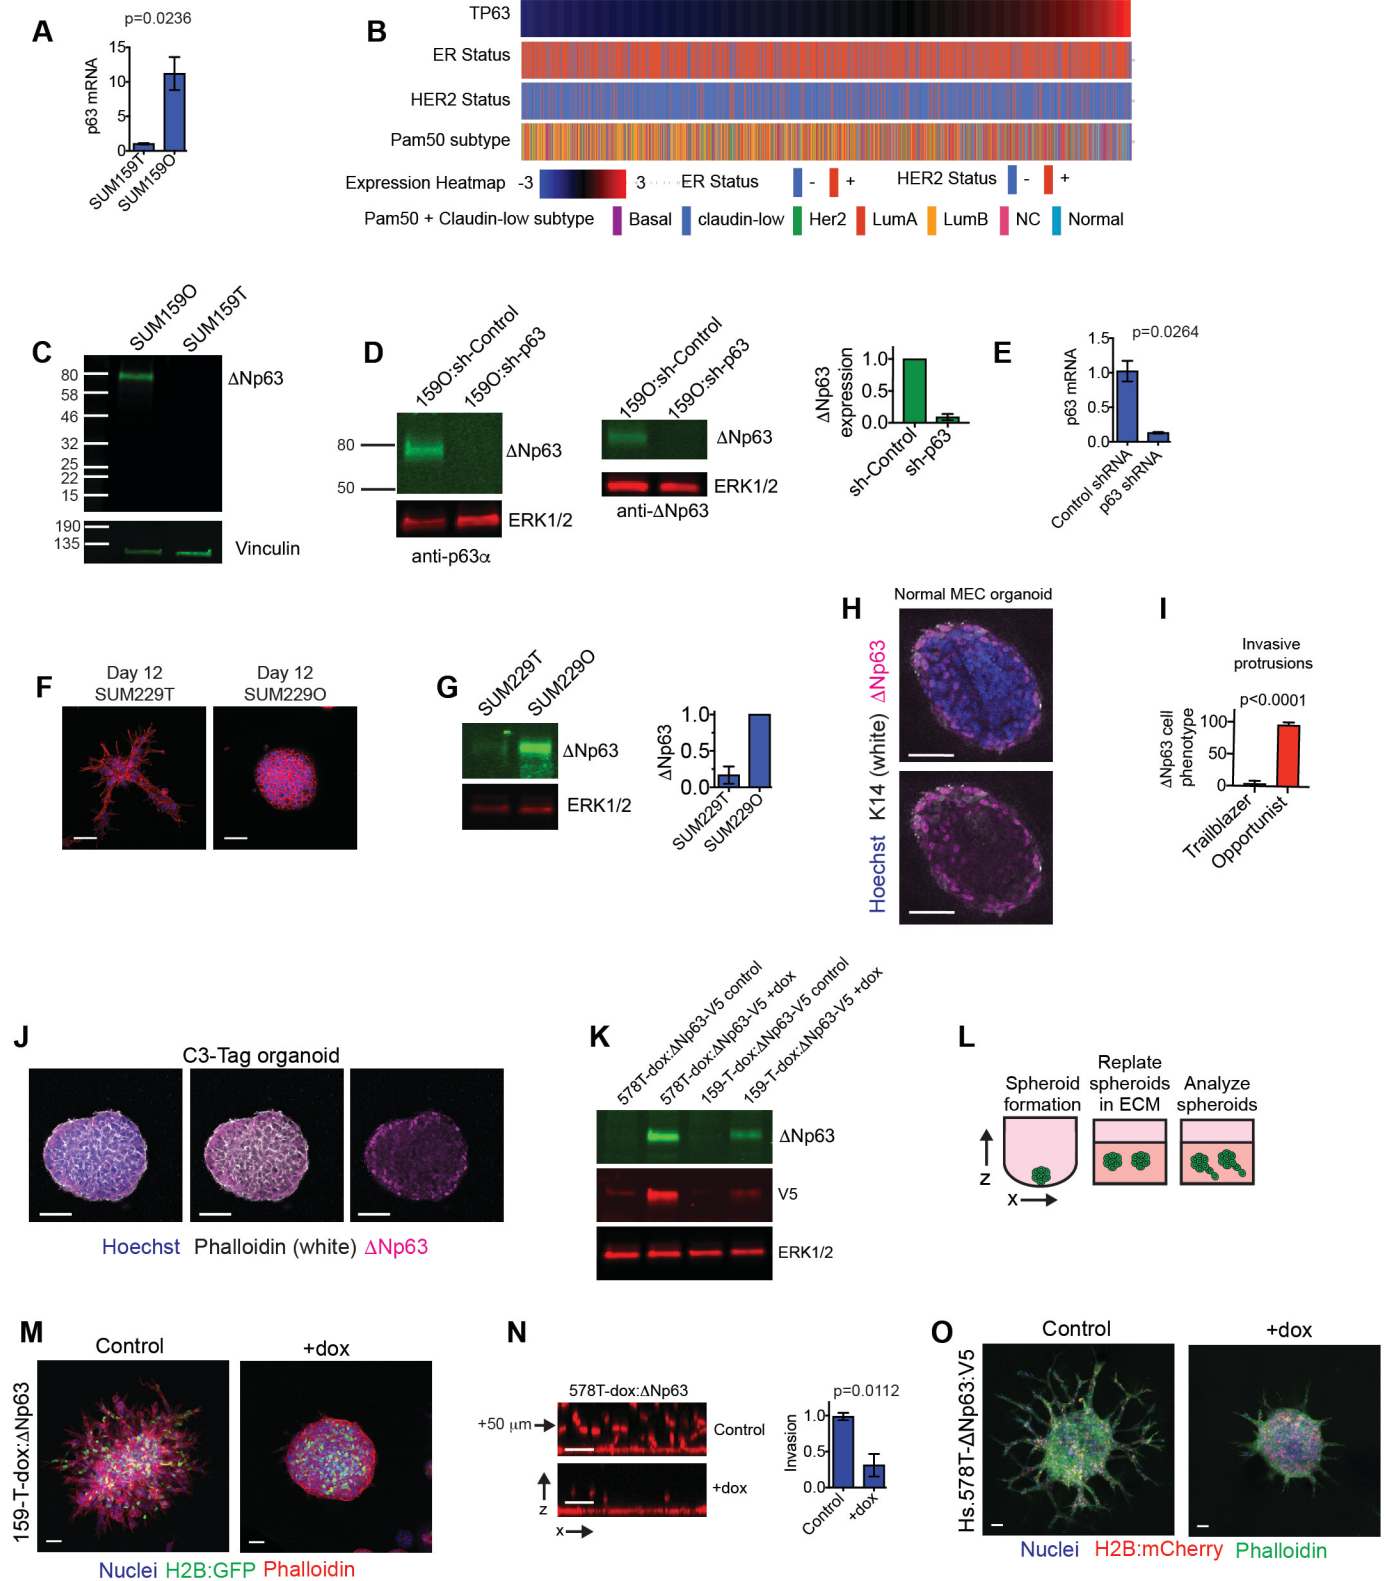

Continued on next page

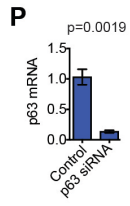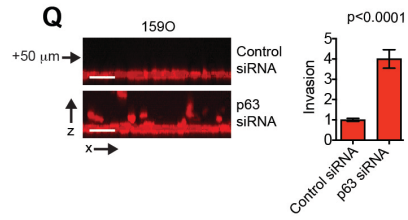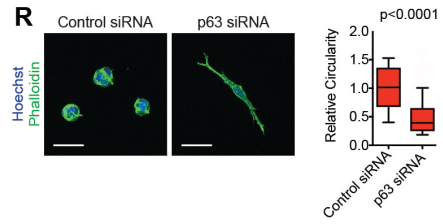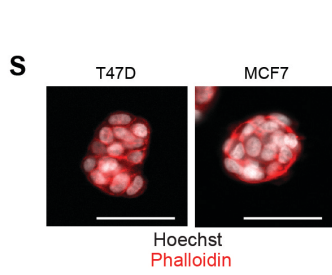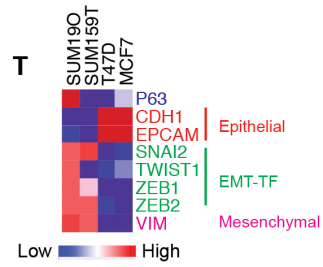

**U**

|               | Static epithelial | Opportunist EMT | Trailblazer EMT |
|---------------|-------------------|-----------------|-----------------|
| $\Delta$ Np63 | -                 | +               | -               |
| EMT-TF        | -                 | +               | +               |
| Nonmotile     | +                 | -               | -               |
| Motile        | -                 | +               | +               |
| Invasive      | -                 | -               | +               |

**Figure S1.** (A)  $\Delta$ Np63 mRNA expression in SUM159T and SUM159O cells determined by qPCR (mean $\pm$ SEM, n=5). (B) p63 expression and corresponding ER status, HER2 status and PAM50 subtype in breast cancer patients from the METABRIC dataset. (C) Immunoblot showing the expression of  $\Delta$ Np63 using a  $\Delta$ Np63 specific antibody. Vinculin expression serves as a loading control. (D) An anti-p63 $\alpha$  antibody detects p63 protein at the same molecular weight as the  $\Delta$ Np63 antibody in C. The expression of  $\Delta$ Np63 is depleted by p63 shRNA that targets all p63 isoforms, and is detected by the anti-p63 $\alpha$  and anti- $\Delta$ Np63 antibodies. (E) qPCR results showing p63 depletion by a p63 targeting shRNA. Mean  $\pm$ SEM (n=3). (F) SUM229 trailblazer (T) and opportunist (O) spheroids grown for 12 days in 3D culture and stained with phalloidin are shown (n=3). Scale bars, 50  $\mu$ m. (G) Immunoblot shows  $\Delta$ Np63 expression in SUM229T and SUM229O cells. Graph shows quantification of  $\Delta$ Np63 expression (mean $\pm$ standard deviation (SD) n=3). (H)  $\Delta$ Np63 expression in mammary epithelial organoids. Scale bar, 50  $\mu$ m. (I) Graph shows quantification of the phenotypes of  $\Delta$ Np63 expressing cells in multicellular protrusions as a percentage of total organoids (mean  $\pm$  SD, n=4 mice). A total of 32 multicellular protrusions were analyzed. (J)  $\Delta$ Np63 expression at the interface with the ECM in noninvasive C3-Tag organoids. Scale bars, 50  $\mu$ m. (K) Immunoblots showing doxycycline (dox) induced expression of V5-tagged  $\Delta$ Np63 in 578T and SUM159T cells. (L) Graphic shows how clusters were formed by plating cells in low-adhesion plates for 24 h before plating in organotypic culture for 72 h. (M) Images show how dox induced  $\Delta$ Np63 expression influences the invasion of clustered SUM159T spheroids. Scale bars, 50  $\mu$ m. (N) x-z projections and quantification showing how doxycycline induced  $\Delta$ Np63 influences 578T cell invasion (mean  $\pm$  SD, n=3). Arrow is 50  $\mu$ m above the monolayer and indicates invading cells. (O) Images show how dox induced  $\Delta$ Np63 expression influences the invasion of clustered 578T spheroids. Scale bars, 50  $\mu$ m. (P) qPCR results showing p63 depletion by a p63 targeting shRNA and siRNA pool (mean $\pm$ SD, n=5). (Q) x-z projections and quantification showing how p63 siRNAs influences SUM159O invasion (mean $\pm$ SD, n=12, r=3). Arrow is 50  $\mu$ m above the monolayer and indicates invading cells. Scale bars, 50  $\mu$ m. (R) Images show how p63 siRNAs influence the phenotype of SUM159O cells cultured on ECM for 24 h. Scale bars, 50  $\mu$ m. Box and whisker plots (10-90 percentile). Control siRNA (n=1084 spheroids) and p63 siRNA (n=817 spheroids). (S) Images of spheroids formed by luminal-type estrogen receptor positive T47D and MCF7 cells that lack endogenous  $\Delta$ Np63 expression. Scale bars, 50  $\mu$ m. (T) Heatmap showing expression of p63, canonical epithelial (CDH1 (E-cadherin), EpCAM) and EMT-TFs (SNAI2 (Slug), Twist1, ZEB1, ZEB2 and the canonical mesenchymal marker Vimentin). (U) Summary of features that distinguish static epithelial, opportunist EMT and trailblazer EMT states. P-values determined by two-tailed Student's t-test (A, E, I, N) or Mann-Whitney U test (Q-R).

**Figure S2**

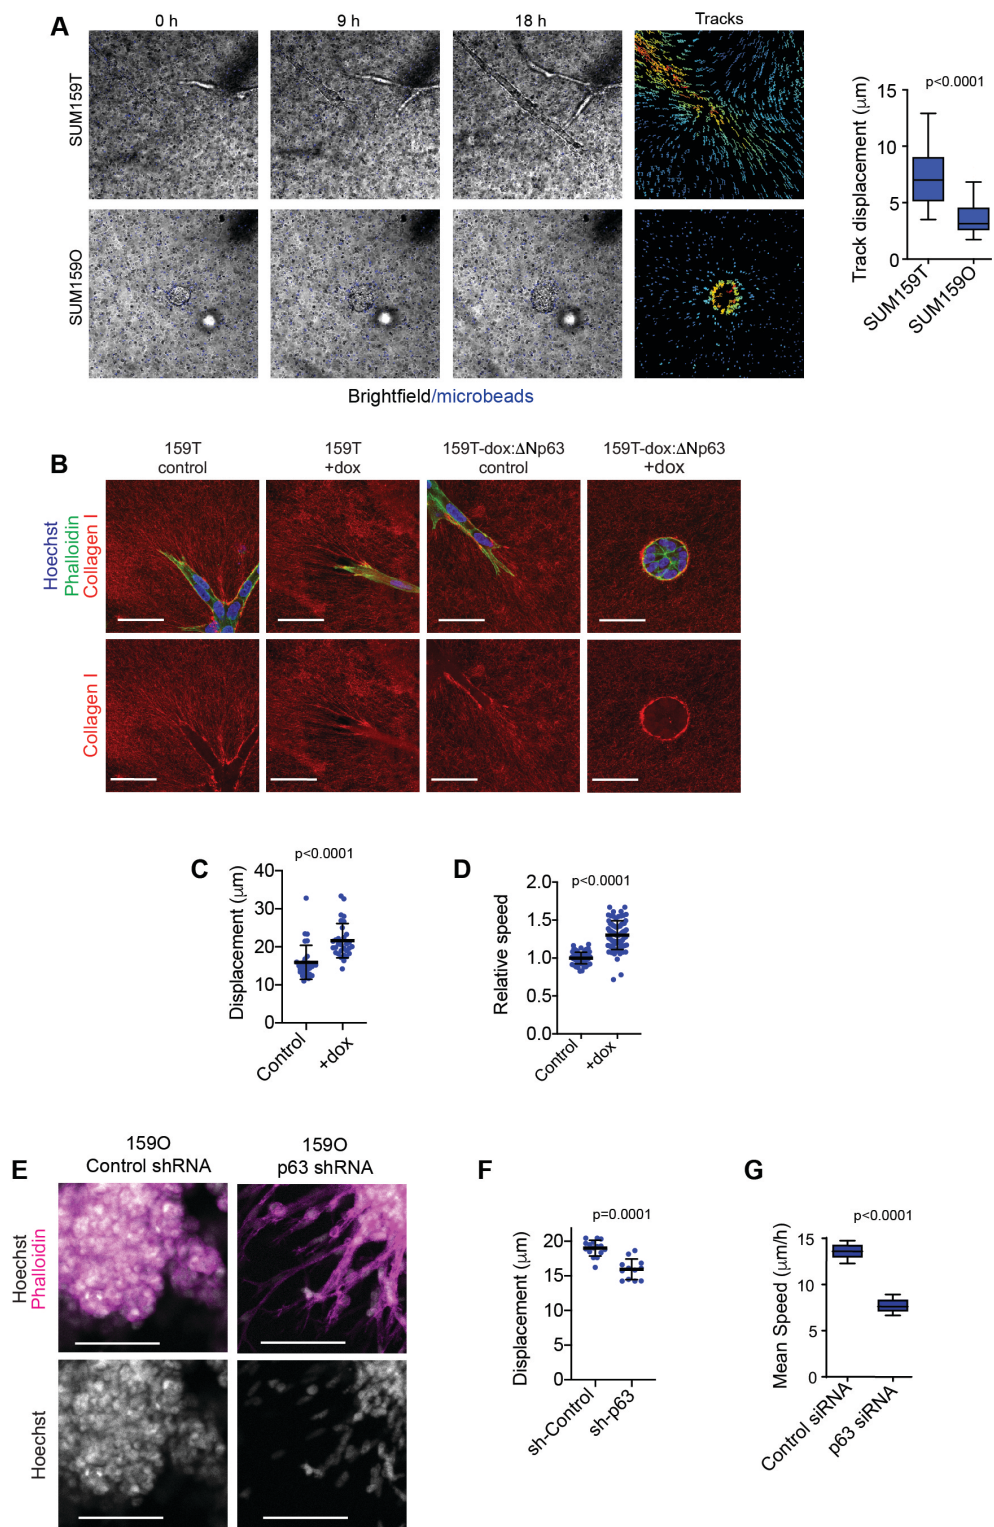



**Figure S2. (A)** Time-lapse imaging showing how trailblazer and opportunist cells influence the displacement of fluorescent microbeads in the surrounding ECM. Box and whisker plot (10-90 percentile). 159T (n=33 fields of view) and 159O (n=28 fields of view). P-values determined by Mann Whitney U test. **(B)** Images show how dox induced  $\Delta$ Np63 expression influences the organization of Collagen I surrounding SUM159T spheroids in 3D culture. Scale bars, 50  $\mu$ m. **(C)** Quantification shows the mean displacement of cells in control and dox induced  $\Delta$ Np63 expressing SUM159T spheroids analyzed in **Fig. 2A-B**. Mean  $\pm$ SD cell speeds for 30 spheroids for each condition. **(D)** Quantification shows how dox induced  $\Delta$ Np63 influences the mean speed of 159T cells grown in 2D monolayers over 6 h of imaging (mean $\pm$ SD, n=75 fields of view). **(E)** Images show control and  $\Delta$ Np63 depleted SUM159O spheroids 72 h after plating in ECM. Scale bars, 100  $\mu$ m. **(F)** Quantification shows the mean displacement of cells in control and p63 shRNA expressing SUM159O spheroids analyzed in **Fig. 2C-D**. Mean  $\pm$  SD cell speed for 16 spheroids (Control) and 12 spheroids (p63 shRNA). **(G)** Quantification showing how p63 shRNA expression influences the mean speed of SUM159O cells grown in 2D monolayers over at least 6 h of imaging (mean $\pm$ SD, n=75 fields of view). P-values determined by two-tailed Student's t-test (**F-G**) or Mann-Whitney U test (**A, C, D**).

**Figure S3**

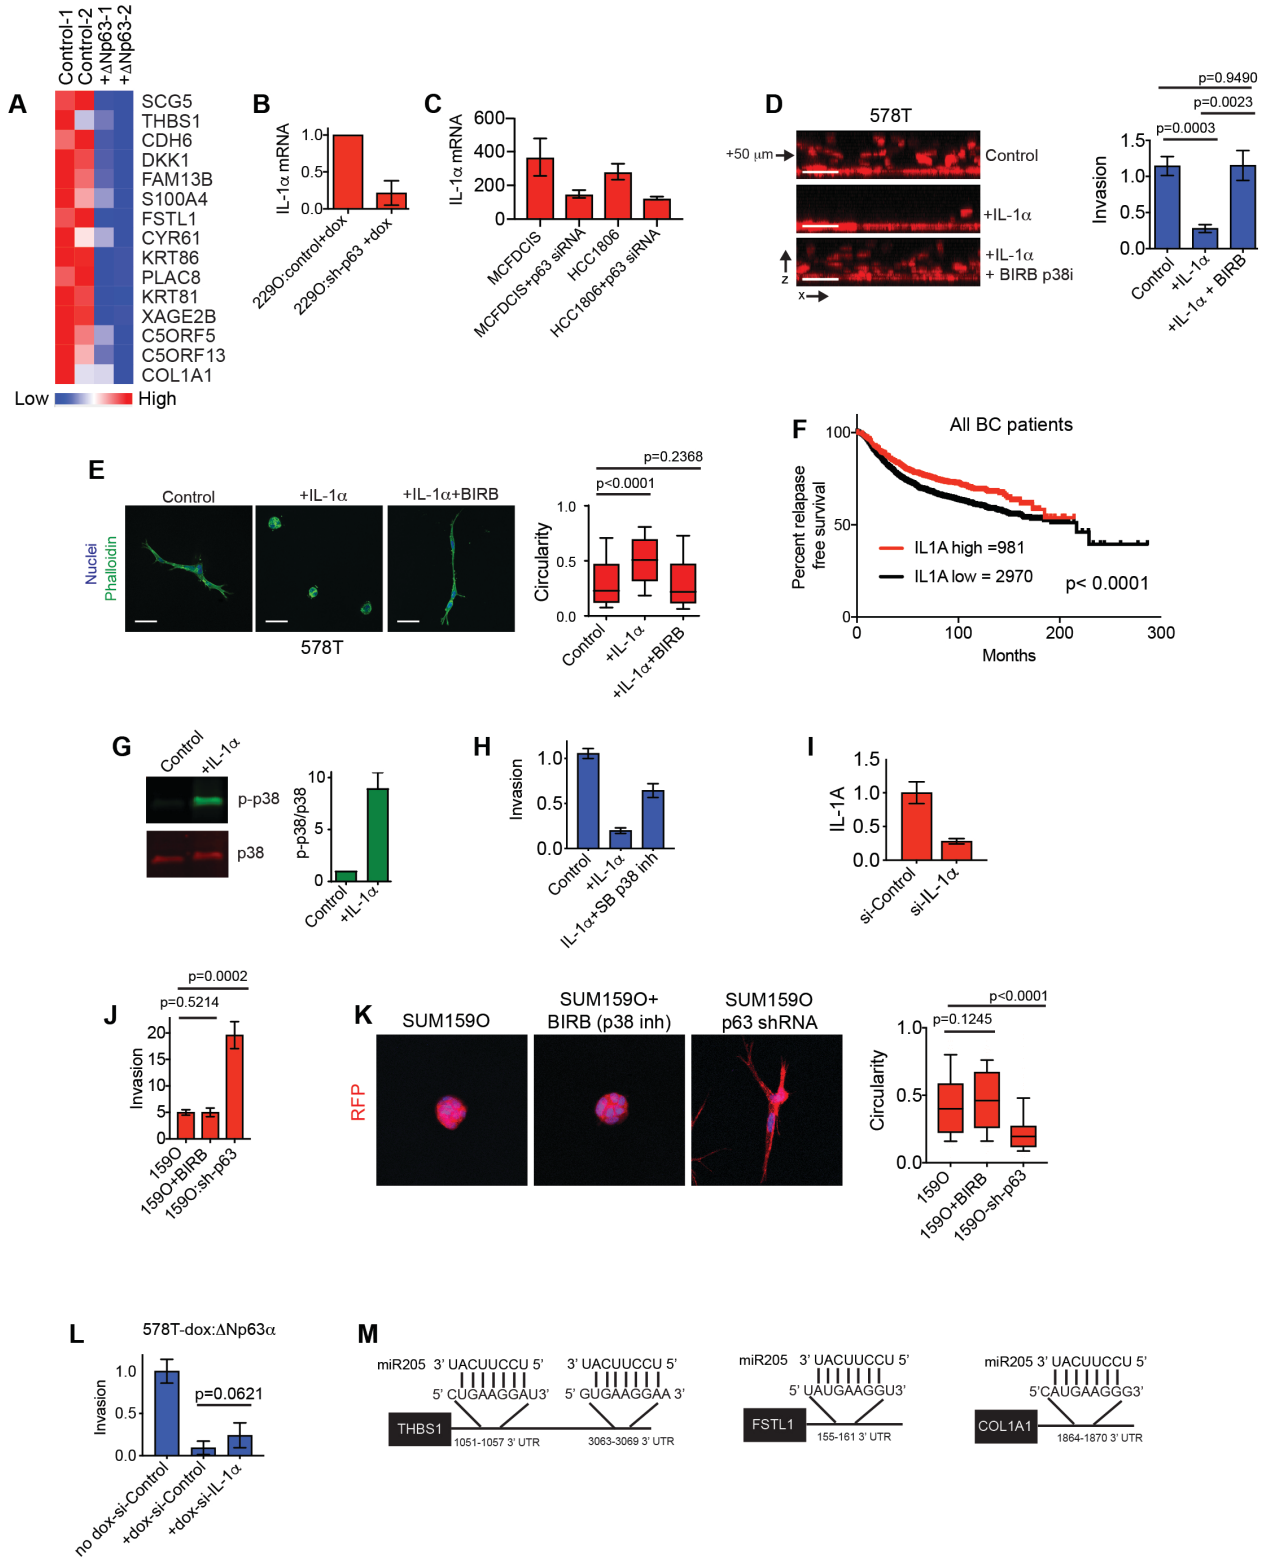

**Figure S3.** (A) Heatmap showing the expression of 15 genes that were decreased at least 2-fold in SUM159T cells following 5 days of  $\Delta$ Np63 induction. Biological replicates are shown. (B) Graph showing how p63 shRNA expression influences IL-1 $\alpha$  levels in SUM229O cells (mean $\pm$ range, n=2). (C) IL-1 $\alpha$  mRNA expression in MCFDCISO and HCC1806 cells following transfection with control or p63 siRNA pools, as determined by microarray. Mean $\pm$ range (n=2). (D) x-z projections and quantification showing how IL-1 $\alpha$  [10 ng/ml] influences 578T invasion. The p38 inhibitor BIRB796 [1  $\mu$ M] was included at the time of IL-1 $\alpha$  treatment where indicated. Arrow is 50  $\mu$ m above the monolayer and indicates invading cells (mean $\pm$ SD, n=5). Scale bars, 50  $\mu$ m. (E) Images and quantification showing how IL-1 $\alpha$  [10 ng/ml] influences the invasion of 578T cells 72 h after plating on ECM. The p38 inhibitor BIRB796 [1  $\mu$ M] was included at the time of IL-1 $\alpha$  treatment where indicated. Scale bars, 50  $\mu$ m. Box and whisker plot (10-90 percentile). Control (n=1452), +IL-1 $\alpha$  (n=1371) and +IL-1 $\alpha$ +BIRB (n=1324 spheroids). (F) Kaplan-Meier curves showing relapse-free survival of breast cancer patients classified as "IL-1 $\alpha$ -high" (red line) and "IL-1 $\alpha$ -low" (black line) based on IL-1 $\alpha$  mRNA expression using KM plotter. (G) Immunoblot showing total p38 MAPK and phospho-p38 MAPK levels following 15 min treatment with IL-1 $\alpha$  [10 ng/ml] (mean+SD, n=3). (H) Quantification showing how the p38 inhibitor SB203580 [1  $\mu$ M] influences the IL-1 $\alpha$  dependent suppression of Hs578T invasion (mean $\pm$ range, n=2). (I) Graph showing how transfection with an IL-1 $\alpha$  siRNA pool influences IL-1 $\alpha$  expression in SUM159O cells (mean $\pm$ range, n=2). (J) Graph shows how the p38 inhibitor BIRB796 [10  $\mu$ M] influences the vertical invasion of SUM159O cells (mean $\pm$ SD, n=8). (K) Images and quantification showing how the p38 inhibitor BIRB796 [10  $\mu$ M] influences the phenotype of SUM159O cells plated onto a layer of ECM for 48 h. Scale bars, 50  $\mu$ m. Box and whisker plots (10-90 percentile). Control (n=129 spheroids), +BIRB (n=138 spheroids) and sh-p63 (n=136 spheroids). (L) Depletion of IL-1 $\alpha$  fails to restore invasive properties in 578T cells expressing dox induced  $\Delta$ Np63 (mean $\pm$ SD, n=6). (M) The location of predicted miR205 targeted seed sequences in THBS1, FSTL1 and COL1A1 determined on Targetscan. P-values were determined by two-tailed Student's t-test (D, L) or Mann-Whitney U test (E, J, K). Survival differences in F were compared using the log-rank (Mantel-Cox) test.

**Figure S4**

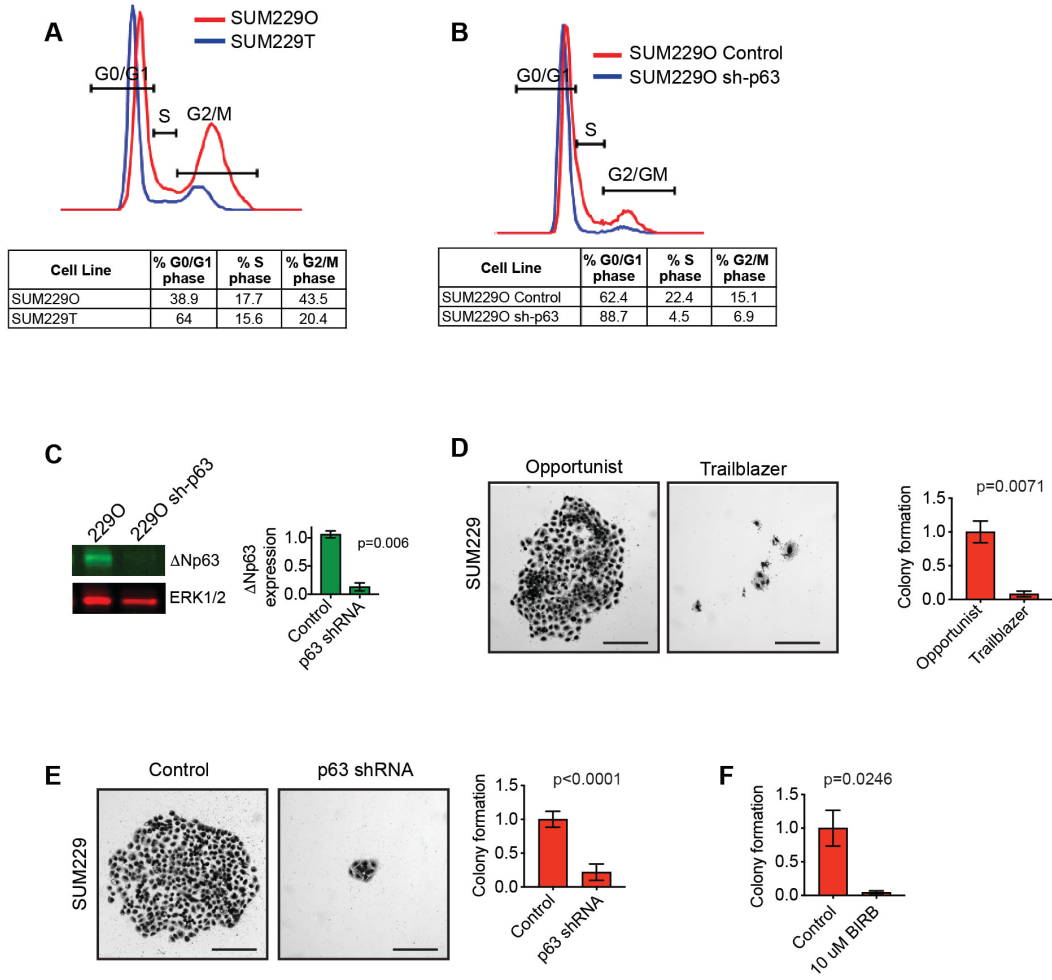

**Figure S4. (A)** Cell cycle analysis by flow cytometry of SUM229O and SUM229T cells. Tables show percentage of live cells in each cell cycle phase from a representative experiment (n=2). **(B)** Cell cycle analysis by flow cytometry of SUM229O cells stably expressing control or p63 shRNAs. Tables show percentage of live cells in each cell cycle phase from a representative experiment (n=2). **(C)**  $\Delta$ Np63 expression in SUM229O cells stably expressing control or p63 shRNA (mean $\pm$ SD, n=3). **(D)** Colony formation by SUM229T and SUM229O cells (mean $\pm$ SD, n=3). Scale bars, 200  $\mu$ m. **(E)** Colony formation by SUM229O and SUM229O:sh-p63 cells (mean $\pm$ SD, n=6). Scale bars, 200  $\mu$ m. **(F)** Colony formation by SUM229O cells treated with 10  $\mu$ M of the p38 inhibitor BIRB796 (mean $\pm$ SD, n=3). Scale bars, 200  $\mu$ m. P-values determined by two-tailed Student's t-test.



# Figure S5

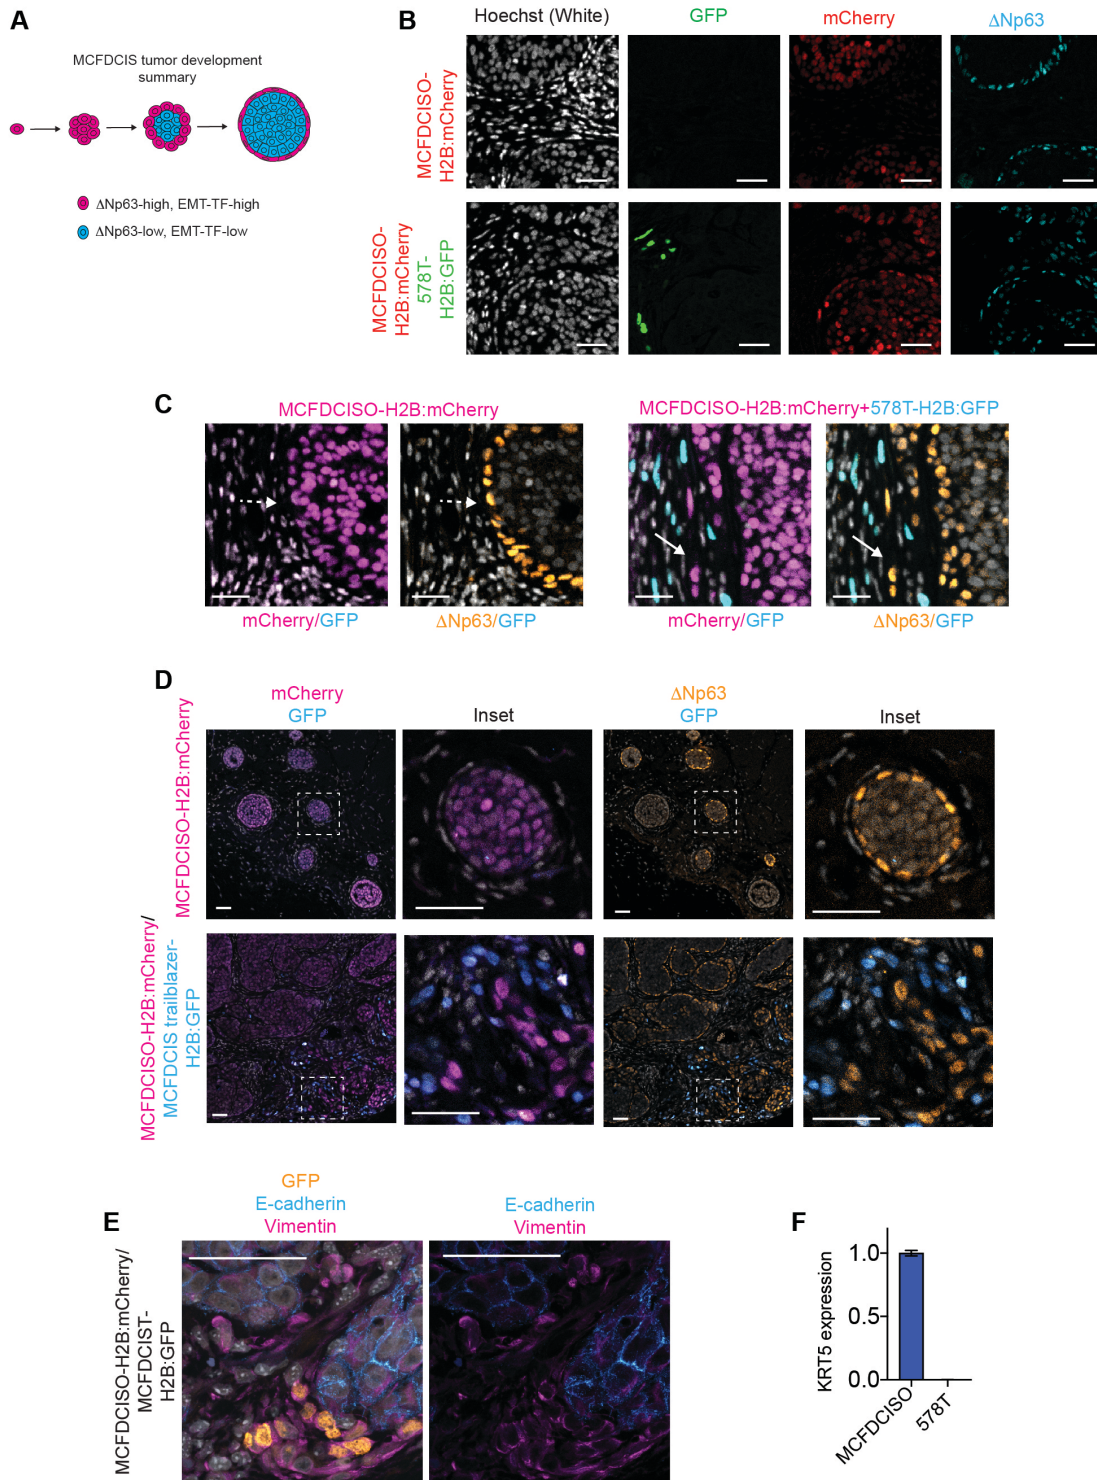

**Figure S5. (A)** Model summarizing the bi-potential nature of MCFDCISO cells when injected into the mammary fatpad of immune-compromised mice. The population injected expresses  $\Delta$ Np63 and is in a  $\Delta$ Np63-high EMT state. During the formation of tumor lesions the central luminal cells lose contact with the ECM and  $\Delta$ Np63 expression is reduced. These cells do not express EMT-TFs and enter a static epithelial state. The  $\Delta$ Np63 expressing cells adopt a myoepithelial phenotype based on the induction of SMA expression. Thus, the tumors have hallmark features of human DCIS. **(B)** Single color channel images corresponding to **Fig. 5A**. Scale bars, 50  $\mu$ m. **(C)** Images show immunostaining of primary tumors composed of MCFDCISO cells alone or a mixture of MCFDCISO and 578T trailblazer cells (1:5 ratio) with GFP, mCherry and  $\Delta$ Np63 antibodies. Solid arrows indicate representative areas of opportunistic collective invasion. Dashed arrows indicate a noninvasive tumor-ECM boundary (n=5 mice per condition). Scale bars, 50  $\mu$ m. **(D)** Immunostaining of primary tumors composed of MCFDCISO cells alone or a mixture of MCFDCISO and MCFDCIST cells (1:10 ratio) using GFP, mCherry and  $\Delta$ Np63 antibodies. Solid arrows indicate representative areas of opportunistic collective invasion. Dashed arrows indicate a noninvasive tumor-ECM boundary (n=5 mice per condition). Scale bars, 50  $\mu$ m. **(E)** Representative immunostaining of MCFDCISO/MCFDCIST primary tumors using GFP, vimentin and E-cadherin antibodies. Scale bars, 50  $\mu$ m. **(F)** KRT5 mRNA expression in MCFDCISO and 578T cells in culture, as determined by microarray (mean $\pm$ range, n=2).

**Video S1. Live imaging of clustered spheroids containing SUM159T-dox:ΔNp63 cells ± doxycycline (H2B:GFP, green, nuclei) showing cell motility.** Fluorescent and bright field images were acquired at 20 min intervals over a span of 13 h. This is the time lapse imaging of the clustered SUM159-T-dox: ΔNp63 cells ± doxycycline shown in **Fig. 2A**. Scale bars, 50 μm.

**Video S2. Live imaging of the inset region of clustered spheroids containing SUM159T-dox:ΔNp63 cells ± doxycycline (H2B:GFP, green, nuclei) showing cell motility.** Fluorescent and bright field images were acquired at 20 min intervals over a span of 13 h. This is the time lapse imaging of the inset region shown in **Fig. 2A**. Scale bars, 50 μm.

**Video S3. Live imaging of SUM159T cells embedded in ECM containing fluorescent microbeads (blue) showing ECM reorganization through bead movement.** Fluorescent and bright field images were acquired at 15 min intervals over a span of 20 h. This is the time lapse imaging of the SUM159T cells and fluorescent microbeads shown in **Fig. S2A**. Scale bars, 50 μm.

**Video S4. Live imaging of SUM159O cells embedded in ECM containing fluorescent microbeads (blue) showing ECM reorganization through bead movement.** Fluorescent and bright field images were acquired at 15 min intervals over a span of 20 h. This is the time lapse imaging of the SUM159O cells and fluorescent microbeads shown **Fig. S2A**. Scale bars, 50 μm.

**Video S5. Live imaging of clustered spheroids containing SUM159O cells expressing control or a p63 shRNA (H2B:mCherry, red, nuclei) showing cell motility.** Fluorescent and bright field images were acquired at 25 min intervals over a span of 13 h. This is the time lapse imaging of clustered SUM159O:sh-Control and SUM159O:sh-p63 cells shown in **Fig. 2C**. Scale bars, 50 μm.

**Video S6. Live imaging of the inset region of clustered spheroids containing SUM159O cells expressing control or a p63 shRNA (H2B:mCherry, red, nuclei) showing cell motility.** Fluorescent and bright field images were acquired at 25 min intervals over a span of 13 h. This is the time lapse imaging of the inset regions shown in **Fig. 2C**. Scale bars, 50 μm.

**Video S7. Live imaging of explants containing MCFDCISO cells (H2B:mCherry, red, nuclei) with or without 578T cells (H2B:GFP, green, nuclei) showing cell motility.** Fluorescent and bright field images were acquired at 45 min intervals over a span of 21 h. This is the time lapse imaging of the tumor explants composed of MCFDCISO cells alone or a mixture of MCFDCISO and 578T cells (1:5 ratio) shown in **Fig. 5D**. Scale bars, 50 μm.

**Table S1. Description of the cell lines used in the study.** Cell line names, invasive phenotype, method of derivation and E-cadherin status are indicated.

**Table S2. Genes expressed at a higher level in SUM159 opportunist cells relative to SUM159 trailblazer cells.** Genes that were at least 4-fold higher in opportunist cells relative to trailblazer cells with a false discovery rate (FDR) of <0.01.

**Table S3. Genes induced by doxycycline induced ΔNp63 expression in SUM159 trailblazer cells.** Genes that were at least 2-fold increased in expression in SUM159 trailblazer cells 5 days after doxycycline-induced ΔNp63 expression.

**Table S4. Genes suppressed by doxycycline induced  $\Delta$ Np63 expression in SUM159 trailblazer cells.** Genes that were at least 2-fold decreased in SUM159 trailblazer cells 5 days after doxycycline induced  $\Delta$ Np63 expression.

**Table S5. MMP expression in control and  $\Delta$ Np63 expressing SUM159 trailblazer cells.** MMP expression in SUM159 trailblazer cells 5 days after doxycycline induced  $\Delta$ Np63 expression.

**Table S6. List of antibodies used for each mode of analysis.**

**Table S7. Targeting sequences of siRNAs and shRNAs.**

**Table S8. List of primers used for qPCR.**
